# Supplementary material
Source: PubMed Central journal article supplement (PMC5832542)
Supplement: NIHMS908489-supplement-Supp_info.pdf [file NIHMS908489-supplement-Supp_info.pdf]

**SUPPLEMENTARY FILES**

**Figure S1. Patients' selection criteria from the United States Acute Liver Failure Study Group registry (January 1998 to August 2016). CRRT: continuous renal replacement therapy; IRR: intermittent renal replacement therapy; RRT: renal replacement therapy.**

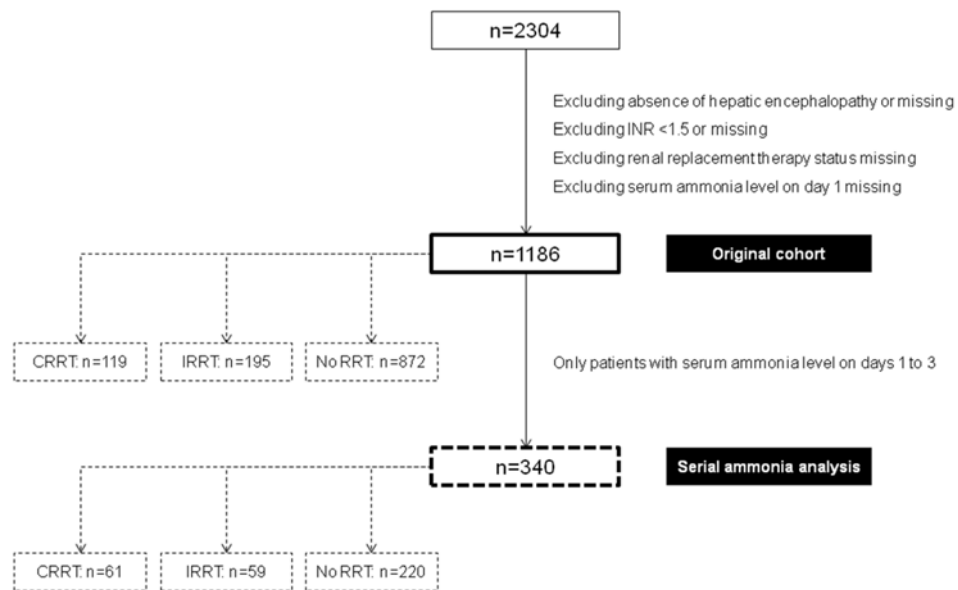

Figure S2. Etiology of acute liver failure for the original cohort (n=1186).

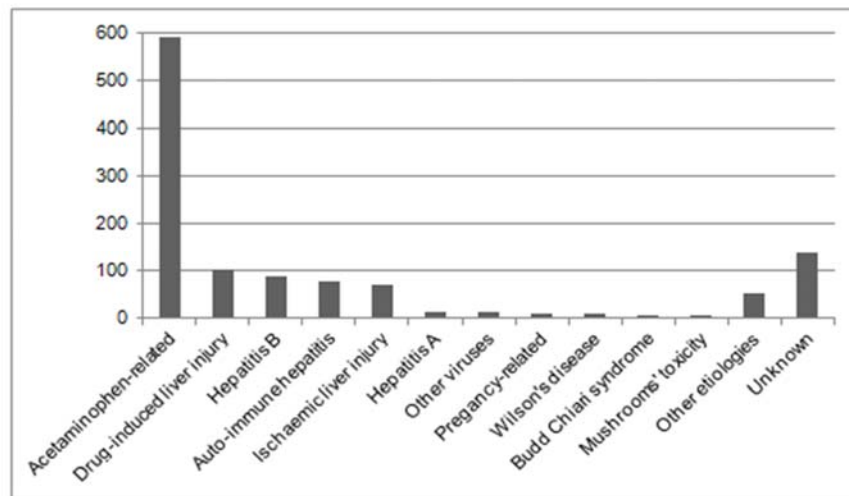

**Figure S3. Causes of death for the original cohort (n=1186).**

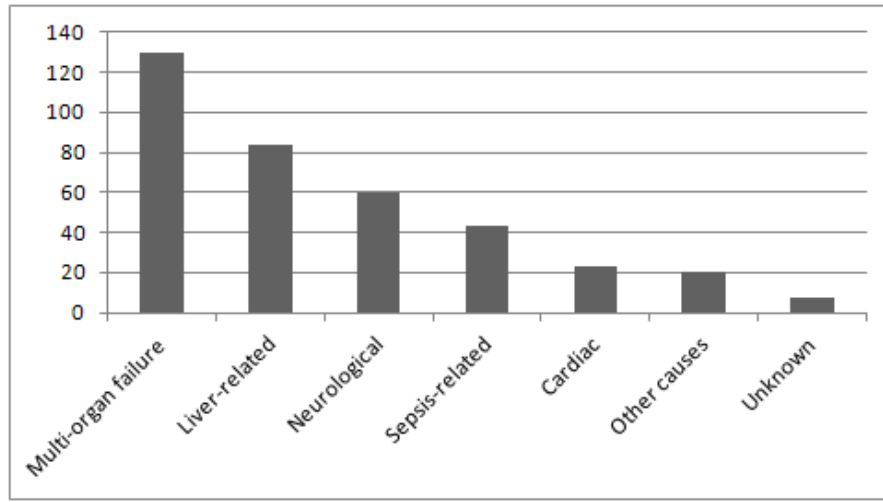

**Table S1. Baseline characteristics of patients with acute liver failure stratified by type of renal replacement therapy at study admission (n=340).**

|                          | n   | n (%) or median (IQR) |                       | P*     |
|--------------------------|-----|-----------------------|-----------------------|--------|
|                          |     | CRRT on Day 1 (n=119) | IRRT on Day 1 (n=195) |        |
| Age                      | 314 | 38 (27-51)            | 38 (28-48)            | 0.94   |
| Sex (female)             | 314 | 81 (68%)              | 131 (67%)             | 0.87   |
| Race                     | 314 |                       |                       | 0.45   |
| White                    |     | 84 (71%)              | 150 (77%)             |        |
| African-american         |     | 18 (15%)              | 22 (11%)              |        |
| Other                    |     | 17 (14%)              | 23 (12%)              |        |
| Etiology (acetaminophen) | 314 | 63 (53%)              | 106 (54%)             | 0.81   |
| HE grades 3-4            | 314 | 83 (70%)              | 140 (72%)             | 0.70   |
| Organ support            | 314 |                       |                       |        |
| Mechanical Ventilation   |     | 97 (82%)              | 157 (81%)             | 0.83   |
| Vasopressors             |     | 76 (64%)              | 100 (51%)             | 0.029  |
| Biochemistry (admission) |     |                       |                       |        |
| Ammonia (µmol/l)         | 314 | 133 (71-203)          | 102 (66-170)          | 0.052  |
| INR                      | 314 | 3.2 (2.4-4.6)         | 2.7 (1.9-4.0)         | 0.003  |
| Bilirubin (mg/dl)        | 312 | 5.8 (3.5-8.9)         | 6.4 (4.0-11.2)        | 0.17   |
| ALT (U/l)                | 309 | 3175 (1174-4645)      | 2370 (821-5005)       | 0.36   |
| Creatinine (mg/dl)       | 312 | 2.3 (1.5-3.5)         | 3.2 (2.0-4.7)         | <0.001 |
| Phosphate (mmol/dl)      | 296 | 3.3 (2.1-5.6)         | 4.2 (2.7-6.2)         | 0.034  |
| pH                       | 301 | 7.39 (7.31-7.45)      | 7.41 (7.33-7.46)      | 0.11   |
| Lactate (mmol/l)         | 244 | 6.2 (3.3-9.7)         | 7.9 (3.7-12.7)        | 0.025  |

*IQR: inter-quartile range. RRT: renal replacement therapy. HE: hepatic encephalopathy. IMV: invasive mechanical ventilation. INR: international normalized ratio. ALT: alanine aminotransferase.*

*\* Mann-Whitney or Chi-square tests.  $\alpha=0.05$*

**Table S2. Serial serum ammonia level of patients with acute liver failure stratified by etiology (acetaminophen vs. other etiologies) from days 1 to 3 post study admission (n=340).**

|                               | n   | Median (IQR) |              |             | P*     |
|-------------------------------|-----|--------------|--------------|-------------|--------|
|                               |     | Day 1        | Day 2        | Day 3       |        |
| Ammonia ( $\mu\text{mol/l}$ ) |     |              |              |             |        |
| <i>Acetaminophen</i>          |     |              |              |             |        |
| Overall                       | 194 | 100 (70-165) | 90 (62-130)  | 76 (48-105) | <0.001 |
| CRRT<br>(on days 1-2)         | 35  | 140 (78-143) | 103 (73-151) | 86 (66-126) | <0.001 |
| IRRT<br>(on days 1-2)         | 36  | 100 (69-135) | 86 (60-105)  | 68 (42-103) | 0.057  |
| No RRT<br>(on days 1-2)       | 123 | 97 (70-154)  | 89 (63-124)  | 76 (48-104) | <0.001 |
| <i>Other etiologies</i>       |     |              |              |             |        |
| Overall                       | 146 | 100 (72-148) | 83 (65-123)  | 87 (56-114) | 0.004  |
| CRRT<br>(on days 1-2)         | 26  | 143 (93-185) | 109 (78-181) | 88 (64-133) | 0.013  |
| IRRT<br>(on days 1-2)         | 23  | 90 (65-133)  | 104 (77-178) | 87 (56-139) | 0.41   |
| No RRT<br>(on days 1-2)       | 97  | 97 (66-136)  | 77 (59-112)  | 86 (55-107) | 0.015  |

IQR: inter-quartile range. RRT: renal replacement therapy. CRRT: continuous renal replacement therapy. IRRT: intermittent renal replacement therapy.

\* Friedman test (comparisons of day 1 vs. day 2 vs. day 3).

$\alpha=0.05$ .

**Table S3. Serial characteristics of patients with acute liver failure (excluding 16 patients on ornithine phenylacetate trial) from days 1 to 3 post study admission (n=324).**

|                      | n   | Day 1            | n   | Day 2            | n   | Day 3            | P*     |
|----------------------|-----|------------------|-----|------------------|-----|------------------|--------|
| RRT (on each day)    |     |                  |     |                  |     |                  |        |
| Overall              | 324 | 88 (27%)         | 324 | 108 (33%)        | 324 | 114 (35%)        | <0.001 |
| CRRT                 | 324 | 42 (13%)         | 324 | 53 (16%)         | 324 | 52 (16%)         | 0.031  |
| IRRT                 | 324 | 46 (14%)         | 324 | 55 (17%)         | 324 | 62 (19%)         | 0.001  |
| HE grades 3-4        | 324 | 162 (50%)        | 306 | 171 (56%)        | 324 | 165 (51%)        | 0.024  |
| Ammonia (μmol/l)     |     |                  |     |                  |     |                  |        |
| Overall              | 324 | 100 (70-156)     | 324 | 88 (64-127)      | 324 | 81 (52-112)      | <0.001 |
| CRRT (on days 1-2)   | 57  | 140 (79-199)     | 57  | 106 (78-176)     | 57  | 88 (66-126)      | <0.001 |
| IRRT (on days 1-2)   | 58  | 99 (69-134)      | 58  | 88 (63-124)      | 58  | 74 (44-114)      | 0.061  |
| No RRT (on days 1-2) | 209 | 96 (67-145)      | 209 | 82 (63-117)      | 209 | 79 (51-105)      | <0.001 |
| INR                  | 324 | 3.0 (2.1-4.2)    | 320 | 2.4 (1.8-3.4)    | 317 | 2.0 (1.6-3.0)    | <0.001 |
| Bilirubin (mg/dl)    | 321 | 5.4 (3.0-15.6)   | 317 | 6.6 (3.5-15.1)   | 317 | 8.0 (4.1-16.8)   | <0.001 |
| Creatinine (mg/dl)   | 321 | 1.50 (0.90-2.80) | 324 | 1.57 (0.80-2.80) | 320 | 1.50 (0.80-2.45) | <0.001 |
| Lactate (mmol/l)     | 229 | 4.2 (2.5-8.3)    | 184 | 3.2 (2.0-6.2)    | 161 | 2.8 (1.7-5.8)    | <0.001 |

IQR: inter-quartile range. RRT: renal replacement therapy. CRRT: continuous renal replacement therapy. IRRT: intermittent renal replacement therapy. HE: hepatic encephalopathy. INR: international normalized ratio.

\* Friedman test (comparisons of day 1 vs. day 2 vs. day 3).

α=0.05.
